# Supplementary material for: Heavy Metal(loid)s Pollution of Agricultural Soils and Health Risk Assessment of Consuming Soybean and Wheat in a Typical Non-Ferrous Metal Mine Area in Northeast China
Source: MDPI journal article supplement (doi:10.3390/su14052953), 2022-03-03
Supplement: s1 [file s1]

*Supplementary materials*

# **Heavy metal(loid)s pollution of agricultural soils and health risk assessment of consuming soybean and wheat in a typical non-ferrous metal mine area in Northeast China**

**Dexian Li<sup>1</sup>, Guannan Liu<sup>1,\*</sup>, Xiaosai Li<sup>1</sup>, Ruiping Li<sup>1</sup>, Juan Wang<sup>2,3</sup> and Yuanyi Zhao<sup>1</sup>**

<sup>1</sup>MNR Key Laboratory of Metallogeny and Mineral Assessment, Institute of Mineral Resources, CAGS, Beijing, 100037, China

<sup>2</sup>Institute of Energy and Environmental Protection, Chinese Academy of Agricultural Engineering, Beijing 100125, China

<sup>3</sup>Key Laboratory of Energy Resource Utilization from Agriculture Residue, Ministry of Agriculture, Beijing 100125, China

\*Correspondence: liu.guannan@126.com (Guannan Liu)

**Table S1.** Kolmogorov-Smirnov (K-S) test of normality for the data sets.

|                        |    | DM soil | TM soil | DDS soil | Soybean | Wheat grains | Soybean BCF | Wheat grain BCF |
|------------------------|----|---------|---------|----------|---------|--------------|-------------|-----------------|
| <b><i>p</i> values</b> | As | 0.157   | 0.386   | 0.977    | 0.394   | 0.060        | 0.197       | 0.045           |
|                        | Cd | 0.811   | 0.160   | 0.932    | 0.481   | 0.127        | 0.100       | 0.211           |
|                        | Cr | 0.411   | 0.999   | 1.000    | 0.455   | 0.230        | 0.371       | 0.296           |
|                        | Cu | 0.317   | 0.960   | 0.997    | 0.869   | 0.266        | 0.474       | 0.200           |
|                        | Hg | 0.886   | 0.781   | 0.976    | 0.117   | 0.563        | 0.287       | 0.621           |
|                        | Pb | 0.548   | 0.063   | 0.999    | 0.918   | 0.354        | 0.684       | 0.121           |
|                        | Zn | 1.000   | 0.032   | 1.000    | 0.784   | 0.751        | 0.929       | 0.442           |
|                        | Se | 0.816   | 0.448   | 0.908    | 0.070   | 0.671        | 0.033       | 0.270           |
|                        | Mo | 0.865   | 0.785   | 1.000    | 0.430   | 0.636        | 0.322       | 0.194           |
|                        | Mn | 0.578   | 0.998   | 0.929    | 0.970   | 0.625        | 0.896       | 0.131           |

Notes: *p* values (>0.05 ) indicate the data set is normally distributed.

**Table S2.** Soil nutrients of surface soils.

| Studied area                                                | Statistical values  | TN<br>(mg/kg) | TP<br>(%) | NH <sub>4</sub> <sup>+</sup> -N<br>(mg/kg) | NO <sub>3</sub> <sup>-</sup> -N<br>(mg/kg) | Olsen-P<br>(mg/kg) | AK<br>(mg/kg) |
|-------------------------------------------------------------|---------------------|---------------|-----------|--------------------------------------------|--------------------------------------------|--------------------|---------------|
| Duobaoshan<br>mine (DM,<br><i>n</i> =12)                    | Min.                | 2500          | 0.13      | 5.64                                       | 3.58                                       | 38.4               | 160           |
|                                                             | Max.                | 4430          | 0.20      | 8.93                                       | 8.80                                       | 120.0              | 349           |
|                                                             | Mean.               | 3679          | 0.17      | 7.38                                       | 5.37                                       | 74.3               | 229           |
|                                                             | S.D.                | 547           | 0.02      | 1.18                                       | 1.87                                       | 25.8               | 58            |
|                                                             | CV <sup>a</sup> (%) | 14.9%         | 13.7%     | 16.0%                                      | 34.8%                                      | 34.7%              | 25.4%         |
| Tongshan mine<br>(TM, <i>n</i> =10)                         | Min.                | 2310          | 0.11      | 5.43                                       | 3.58                                       | 17.6               | 138           |
|                                                             | Max.                | 6380          | 0.18      | 8.60                                       | 8.68                                       | 107.0              | 504           |
|                                                             | Mean.               | 3539          | 0.14      | 7.69                                       | 6.13                                       | 61.5               | 252           |
|                                                             | S.D.                | 1501          | 0.02      | 0.93                                       | 1.83                                       | 34.7               | 110           |
|                                                             | CV <sup>a</sup> (%) | 42.4%         | 17.2%     | 12.0%                                      | 29.9%                                      | 56.5%              | 43.6%         |
| Downstream of<br>Duobaoshan<br>stream (DDS,<br><i>n</i> =3) | Min.                | 3310          | 0.13      | 7.78                                       | 4.03                                       | 33.8               | 240           |
|                                                             | Max.                | 6290          | 0.19      | 8.30                                       | 5.65                                       | 50.8               | 451           |
|                                                             | Mean.               | 4330          | 0.15      | 8.04                                       | 5.05                                       | 43.3               | 314           |
|                                                             | S.D.                | 1698          | 0.03      | 0.26                                       | 0.89                                       | 8.7                | 119           |
|                                                             | CV <sup>a</sup> (%) | 39.2%         | 21.0%     | 3.2%                                       | 17.5%                                      | 20.0%              | 37.7%         |
| Tongshan min-<br>ing area (KQ,<br><i>n</i> =1)              |                     | 998           | 0.14      | 6.92                                       | 6.58                                       | 19.2               | 193           |

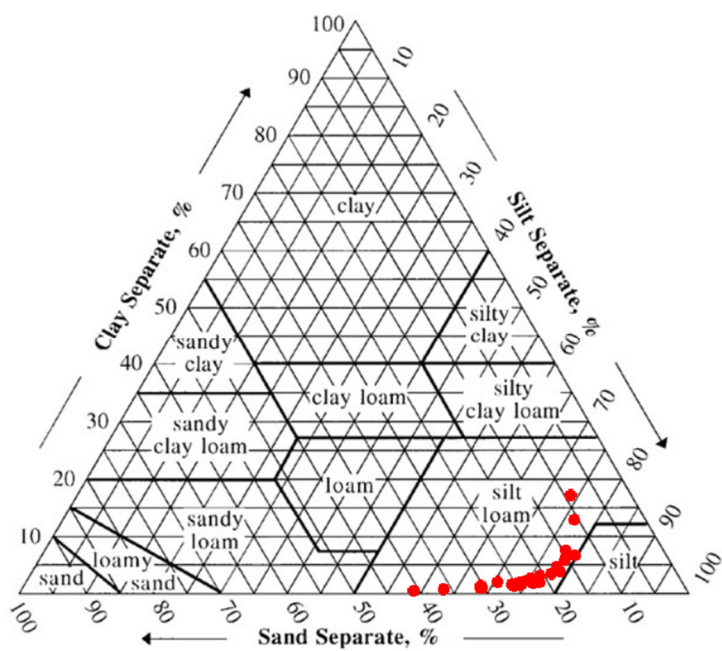

Figure S1. Ternary diagram for sand-silt-clay distribution of soils.
